# Supplementary material for: Salivary SARS-CoV-2 antibody detection using S1-RBD protein-immobilized 3D melt electrowritten poly(ε-caprolactone) scaffolds
Source: Royal Society of Chemistry journal article supplement (doi:10.1039/d2ra03979f), 2022-01-01
Supplement: d2ra03979f1.pdf [file d2ra03979f1.pdf]

### Supporting Information for

#### **Sensitive salivary SARS-CoV-2 antibody detection using S1-RBD protein-immobilized 3D melt electrowritten poly( $\epsilon$ -caprolactone) scaffolds**

*Pingping Han*<sup>1,2, #</sup>, *Chun Liu*<sup>1,2, #</sup>, *Reuben Stapes*<sup>1,2</sup>, *Corey S. Moran*<sup>1,2</sup>,

*Srinivas Sulugodu Ramachandra*<sup>1,2</sup>, *Maria Natividad Gómez Cerezo*<sup>1,2, \*</sup>, *Sašo*

*Ivanovski*<sup>1,2, \*</sup>.

1. The University of Queensland, School of Dentistry, Brisbane, QLD 4006, Australia
2. The University of Queensland, School of Dentistry, Center for Oral-facial Regeneration, Rehabilitation and Reconstruction (COR3), Brisbane, QLD 4006, Australia

#: co-first author

\* Corresponding authors:

M.N.G.C: [m.gomezcerezo@uq.edu.au](mailto:m.gomezcerezo@uq.edu.au)

S.I.: [s.ivanovski@uq.edu.au](mailto:s.ivanovski@uq.edu.au)

**Supplementary Table 1.** Relative elemental concentrations of the PCL scaffolds from XPS (atomic %; mean  $\pm$  SD).

|                   | <b>C 1s</b>     | <b>O 1s</b>     | <b>N 1s</b>     |
|-------------------|-----------------|-----------------|-----------------|
| <b>S1-RBD-PCL</b> | 79.7 $\pm$ 0.36 | 18.4 $\pm$ 0.19 | 1.83 $\pm$ 0.43 |
| <b>Blank PCL</b>  | 82.6 $\pm$ 0.47 | 17.4 $\pm$ 0.47 |                 |

**Supplementary Table 2.** The percentage of positive immune responses over time.

|                               | <b>N<br/>V</b> | <b>Post-vaccine dose 1</b> |                | <b>Post-vaccine dose 2</b> |               |                |           | <b>Total</b> |     |     |     |  |
|-------------------------------|----------------|----------------------------|----------------|----------------------------|---------------|----------------|-----------|--------------|-----|-----|-----|--|
|                               |                | <b>1 week</b>              | <b>3 weeks</b> | <b>3 days</b>              | <b>1 week</b> | <b>3 weeks</b> |           |              |     |     |     |  |
| <b>n</b>                      | 14             | 20                         | 20             | 19                         | 19            | 19             | 111       |              |     |     |     |  |
|                               |                | <b>% Positive</b>          |                | <b>% Positive</b>          |               |                |           |              |     |     |     |  |
| <b>Anti-SARS-CoV-2 S1 RBD</b> |                | <b>3D</b>                  | <b>2D</b>      | <b>3D</b>                  | <b>2D</b>     | <b>3D</b>      | <b>2D</b> |              |     |     |     |  |
|                               | IgG            | 15                         | 5              | 55                         | 25            | 60             | 10.5      | 89.          | 94. | 84. | 73. |  |
|                               | IgM            | 15                         | 10             | 89.                        | 66.           | 50             | 47.3      | 68.          | 63. | 44. | 38. |  |
|                               | IgA            | 25                         | 5              | 15                         | 55            | 15.            | 15.8      | 63.          | 42. | 61. | 16. |  |
|                               |                |                            |                |                            |               | 8              |           | 2            | 1   | 1   | 7   |  |

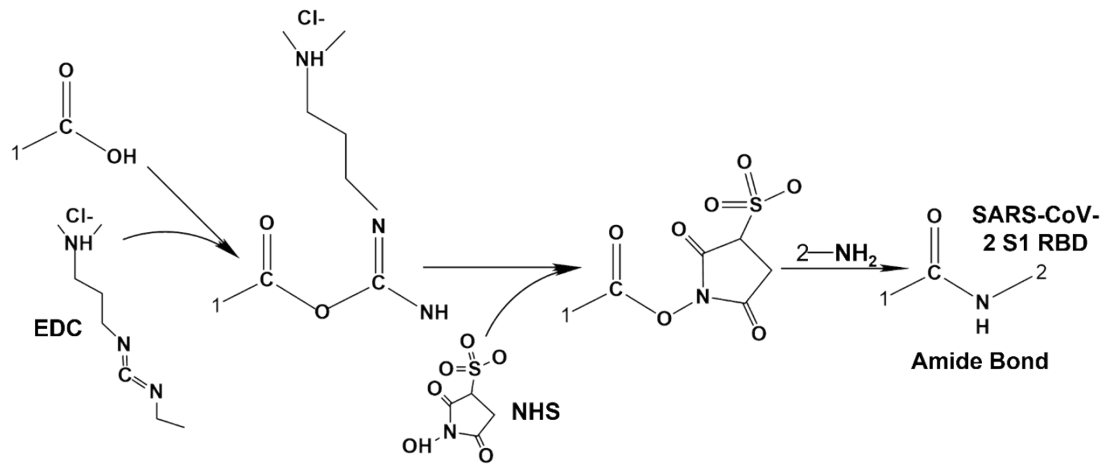

**Supplementary Figure 1.** Carbodiimide crosslinker chemistry is used to immobilise S1-RBD on PCL scaffolds.

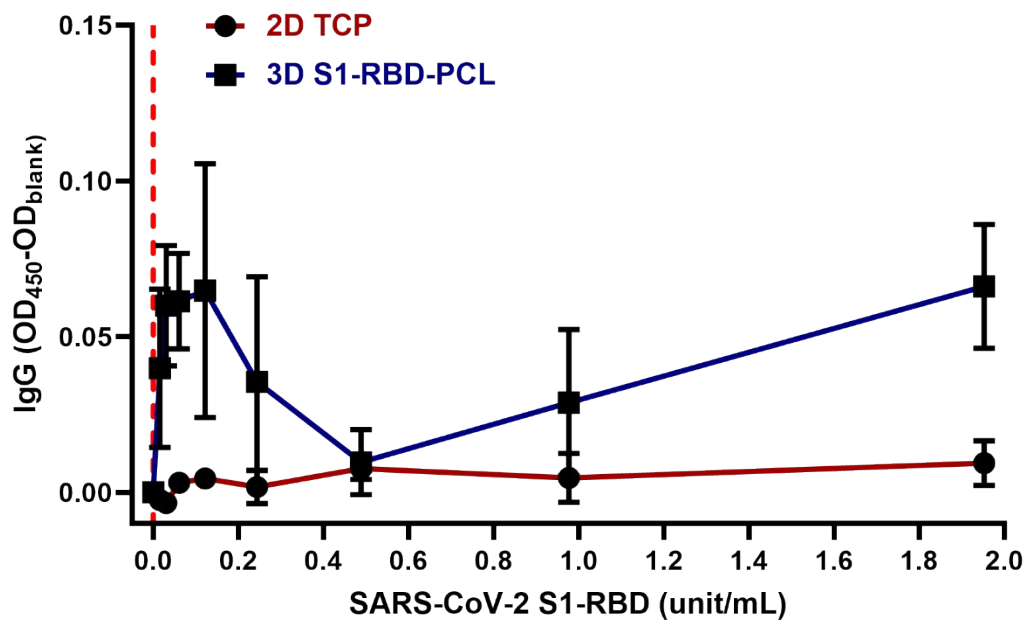

**Supplementary Figure 2.** The detection limits assay using 8 additional concentrations of positive controls that provided by the kit for 3D and 2D assays. .

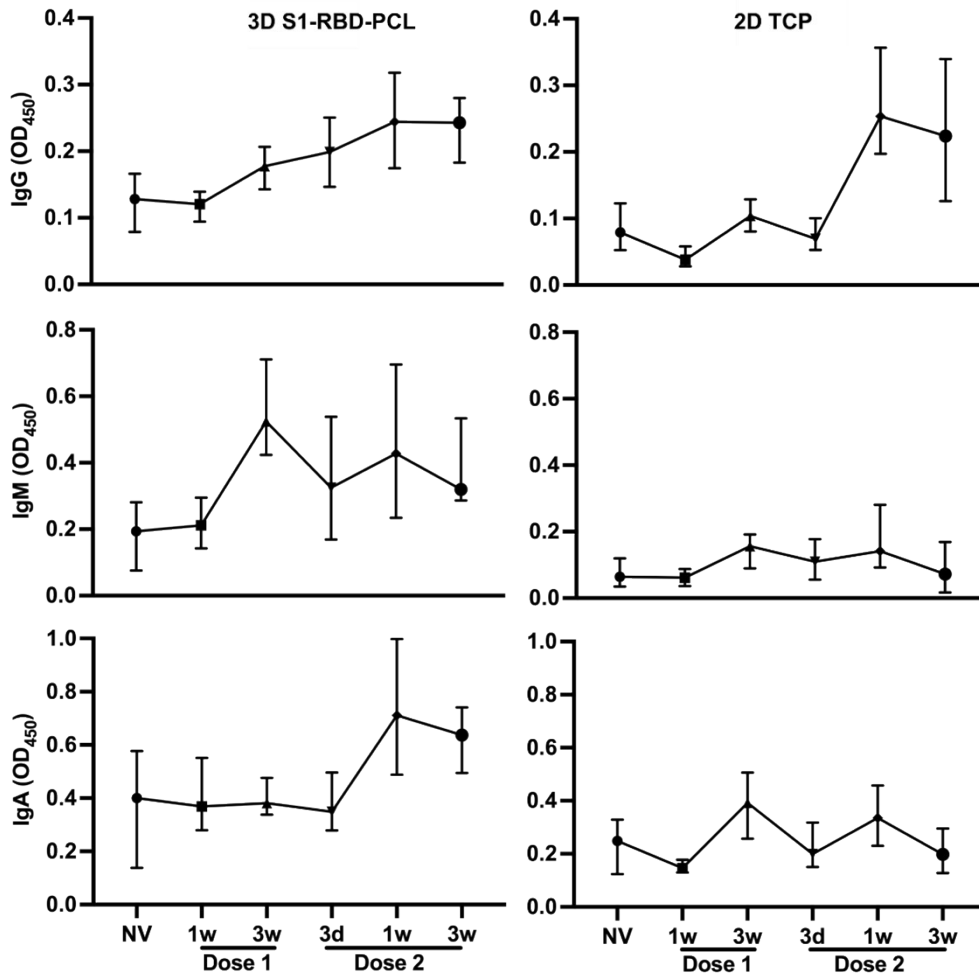

**Supplementary Figure 3.** The kinetics trend of salivary antibody against SARS-CoV-2 S1-RBD with time for 3D and 2D assays. Data are displayed as median  $\pm$  95 % confidence interval.
